# Supplementary material for: Oxalate-based 2D magnets: the series [NBu4][MIIMnIII(ox)3] (MII= Fe, Co, Ni, Zn; ox = oxalate dianion)
Source: Royal Society of Chemistry journal article supplement (doi:10.1039/b602250b), 2006-01-01
Supplement: b602250b.pdf [file b602250b.pdf]

SUPPLEMENTARY INFORMATION

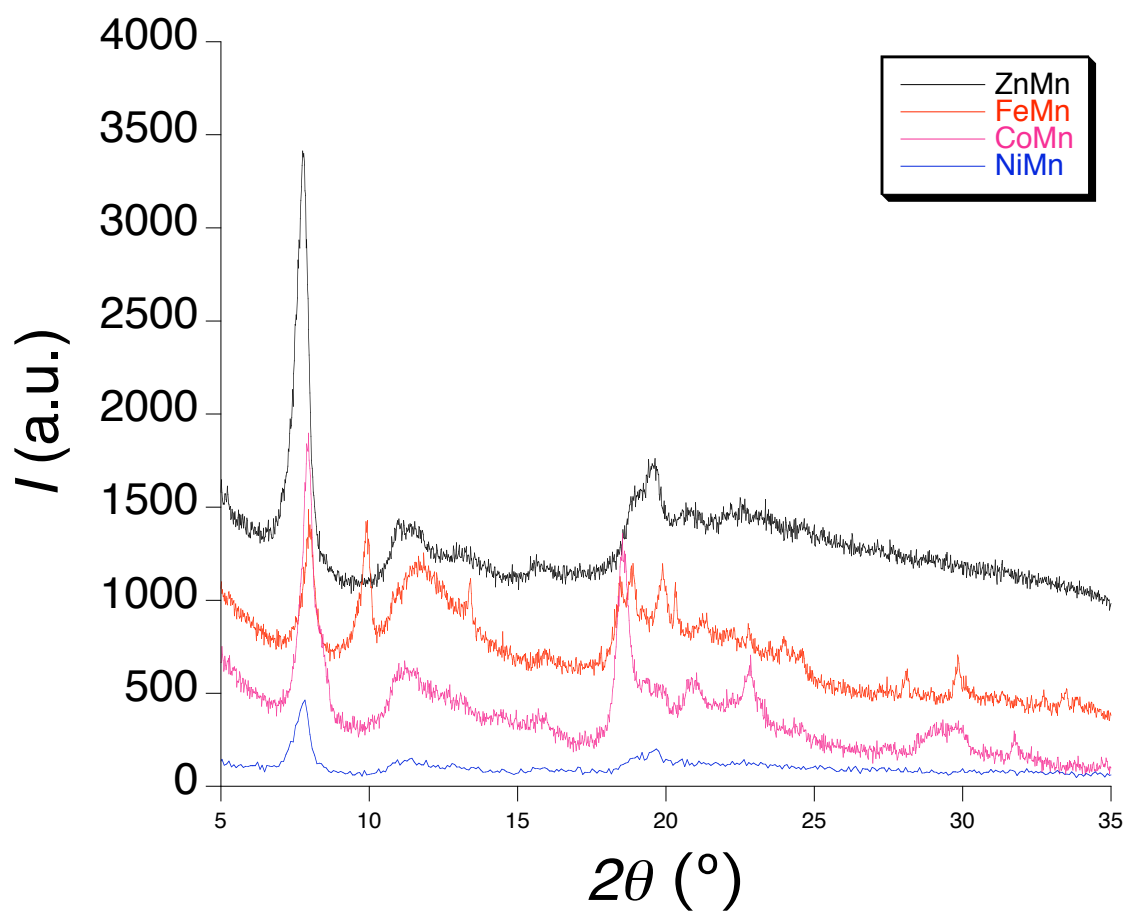

Fig. S1. X-ray powder patterns for compounds 2-5.

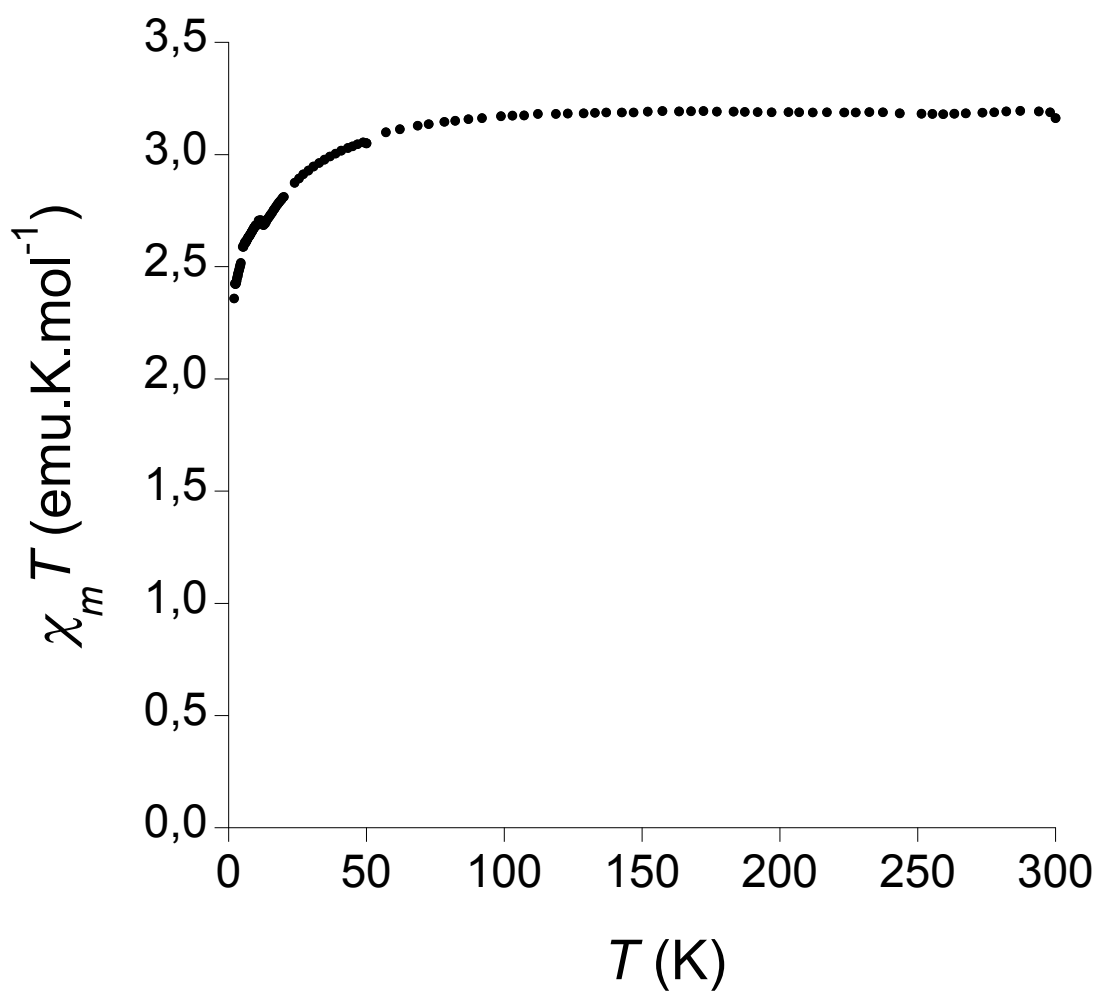

**Fig. S2** Thermal dependence of the  $\chi_m T$  product for compound **2**.

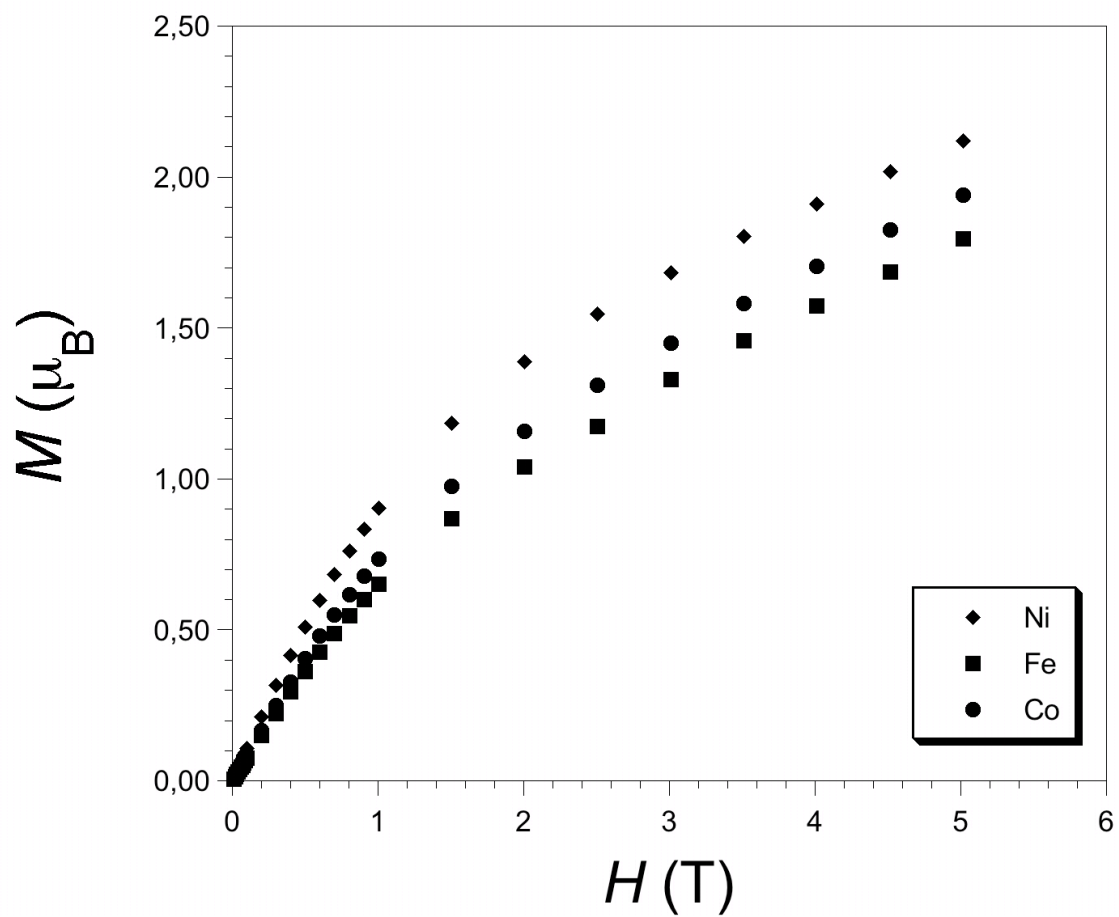

**Fig. S3** Field dependence of the magnetization for compounds **3-5**.

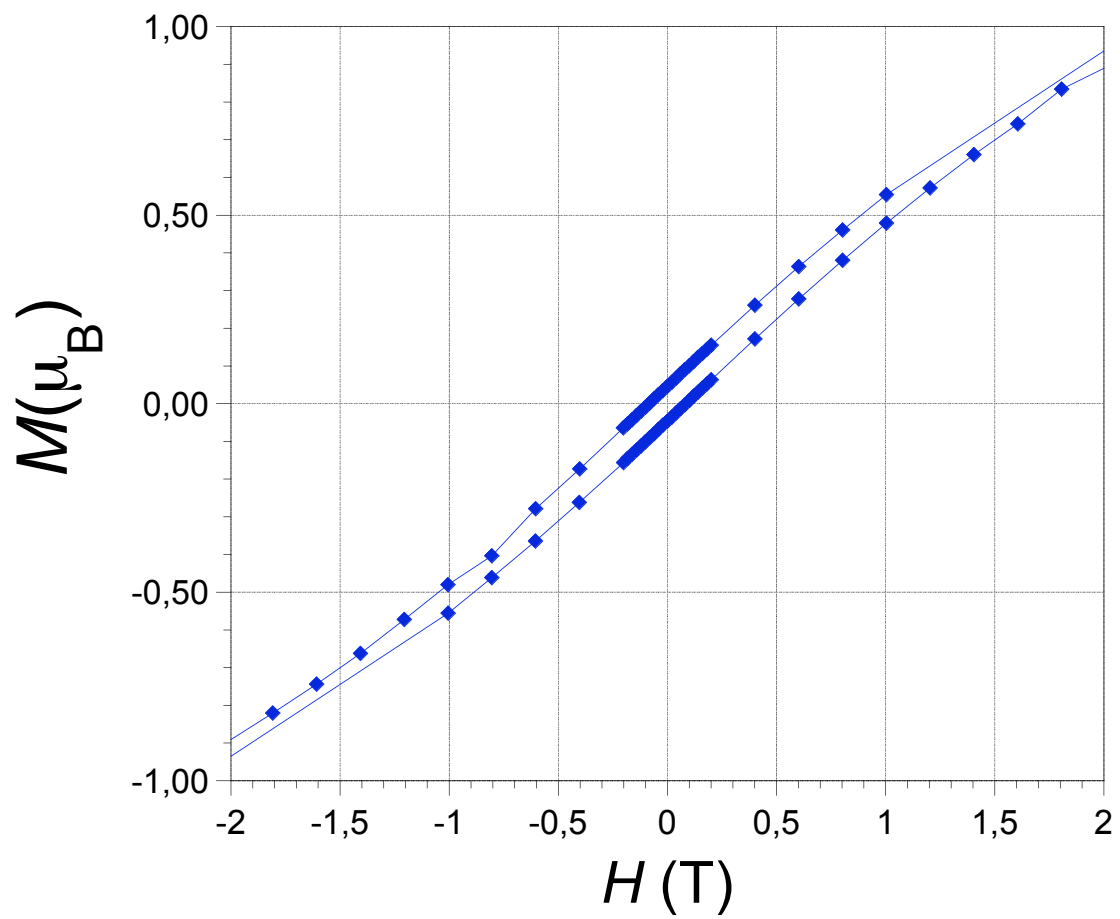

**Fig. S4.** Magnetic hysteresis at 2 K for compound 5.
